# Supplementary material
Source: Springer Nature journal article supplement (https://www.springermedizin.de/resource/supplementary/12974_2011_463_MOESM8_ESM.pdf/9601334)

**CCL20**

**NeuN**

**Merge**

**Sham**

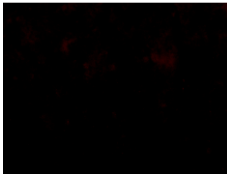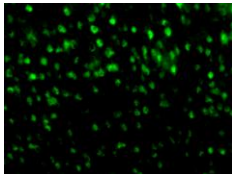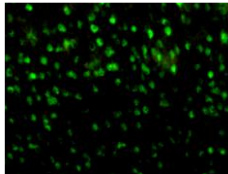

**TBI**

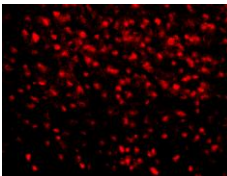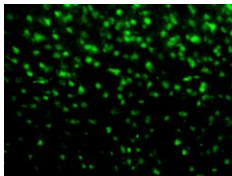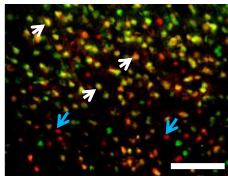

Supplement: MOESM8 [file 9601334]
